# Supplementary material
Source: PubMed Central journal article supplement (PMC5722699)
Supplement: NIHMS906146-supplement-2.pdf [file NIHMS906146-supplement-2.pdf]

**Supplementary Fig. 2**

| <b>PDHA1- Only Group (males)</b> |                          |             |             | <b>All-CIDEM Group (males)</b> |             |             |          |           |
|----------------------------------|--------------------------|-------------|-------------|--------------------------------|-------------|-------------|----------|-----------|
| Skin Fb                          | Total                    | 11          | 3           | <b>14</b>                      | Total       | 22          | 6        | <b>28</b> |
|                                  | Normal                   | <b>3</b>    | 0           | 3                              | Normal      | <b>11</b>   | 1        | 12        |
|                                  | Low                      | 8           | <b>3</b>    | 11                             | Low         | 11          | <b>5</b> | 16        |
|                                  |                          | Low         | Normal      | Total                          |             | Low         | Normal   | Total     |
|                                  |                          | Lymph       |             |                                |             | Lymph       |          |           |
| Skin Fb                          | Total                    | 13          | 2           | <b>15</b>                      | Total       | 21          | 4        | <b>25</b> |
|                                  | Normal                   | <b>1</b>    | 0           | 1                              | Normal      | <b>5</b>    | 0        | 5         |
|                                  | Low                      | 12          | <b>2</b>    | 14                             | Low         | 16          | <b>4</b> | 20        |
|                                  |                          | Low         | Normal      | Total                          |             | Low         | Normal   | Total     |
|                                  |                          | Muscle      |             |                                |             | Muscle      |          |           |
| Lymph                            | Total                    | 7           | 0           | <b>7</b>                       | Total       | 11          | 3        | <b>14</b> |
|                                  | Normal                   | <b>2</b>    | 0           | 2                              | Normal      | <b>3</b>    | 0        | 3         |
|                                  | Low                      | 5           | <b>0</b>    | 5                              | Low         | 8           | <b>3</b> | 11        |
|                                  |                          | Low         | Normal      | Total                          |             | Low         | Normal   | Total     |
|                                  |                          | Muscle      |             |                                |             | Muscle      |          |           |
| Discordance (males only):        |                          |             |             | Discordance (males only):      |             |             |          |           |
|                                  | <b>0.21</b>              | <b>0.07</b> | <b>0.29</b> | <b>0.18</b>                    | <b>0.16</b> | <b>0.21</b> |          |           |
|                                  | <b>0.21</b>              | <b>0.13</b> | <b>0.00</b> | <b>0.39</b>                    | <b>0.20</b> | <b>0.21</b> |          |           |
|                                  | <b>Mean discordance:</b> | <b>0.15</b> |             | <b>Mean discordance:</b>       | <b>0.23</b> |             |          |           |
|                                  | <b>STD:</b>              | <b>0.11</b> |             | <b>STD:</b>                    | <b>0.08</b> |             |          |           |

**Supplementary Fig. 2.** Cell/tissue type-specific discordance analysis (reflecting tissue variability). Number of subjects (in the two groups) where PDC activity was analyzed in more than one cell/tissue type. "Low" implies PDC activity below cutoff for that specific cell/tissue type (see Materials and Methods 2.2). Discordant numbers and totals (bold blue) were used to calculate frequencies (bold red) for the pair of cell/tissue. As noted, discordance mean  $\pm$  STD were calculated using the six pairs of data for each group. Abbreviations: Lymph, lymphocytes; Fb, fibroblasts; and Muscle, skeletal muscle.
