# Supplementary material
Source: PubMed Central journal article supplement (PMC5722699)
Supplement: NIHMS906146-supplement-3.pdf [file NIHMS906146-supplement-3.pdf]

Supplementary Table 1

| Count | Patient # | Sex | PDC Lymph    | PDC Fb       | PDC Musc     | Gene  | Mutation                  | Protein      |
|-------|-----------|-----|--------------|--------------|--------------|-------|---------------------------|--------------|
| 1     | 1         | M   | 0.08         | 0.68         | 0.10         | PDHA1 | c.1133G>A                 | R378H        |
| 2     | 2         | M   | ND           | 0.32         | 0.23         | PDHA1 | c.650C>T                  | P217L        |
| 3     | 3         | M   | 0.99         | ND           | 0.16         | PDHA1 | c.1133G>A                 | R378H        |
| 4     | 4         | M   | ND           | 0.00         | ND           | PDHA1 | c.933-935 del             | R311 del     |
| 5     | 5         | M   | 0.02         | 0.11         | 0.27         | PDHA1 | c.628A>G                  | M210V        |
| 6     | 6         | M   | ND           | 0.13         | 0.06         | PDHA1 | c.530T>C                  | I177T        |
| 7     | 7         | M   | 0.01         | 0.36         | 0.14         | PDHA1 | c.380G>A                  | R127Q        |
| 8     | 8         | M   | 0.50         | 1.24         | ND           | PDHA1 | c.787C>G                  | R263G        |
| 9     | 9         | M   | 0.01         | 0.74         | 0.56         | PDHA1 | c.1045G>A                 | A349T        |
| 10    | 11        | M   | 1.06         | 0.36         | ND           | PDHA1 | c.491A>G                  | N164S        |
| 11    | 13        | M   | ND           | 0.33         | ND           | PDHA1 | c.1133G>A                 | R378H        |
| 12    | 17        | M   | ND           | 0.47         | 0.52         | PDHA1 | c.1159-60 ins dup 1121-59 |              |
| 13    | 22        | M   | ND           | 0.62         | 1.95         | PDHA1 | c.1157-58 ins 4 dup       | fs term      |
| 14    | 23        | M   | 1.13         | 0.99         | 1.13         | PDHA1 | c.592G>A                  | skips exon 6 |
| 15    | 24        | M   | 0.68         | 2.08         | 0.07         | PDHA1 | c.405+5G>A                |              |
| 16    | 25        | M   | ND           | 1.10         | 3.05         | PDHA1 | c.847G>A                  | E283K        |
| 17    | 26        | M   | ND           | 0.48         | ND           | PDHA1 | c.1159-60 ins dup 1137-59 | fs term      |
| 18    | 27        | M   | ND           | 0.56         | 0.11         | PDHA1 | c.1132C>T                 | R378C        |
| 19    | 28        | M   | ND           | 0.24         | ND           | PDHA1 | c.380G>A                  | R127Q        |
| 20    | 34        | M   | ND           | 0.42         | 0.05         | PDHA1 | c.1133G>A                 | R378H        |
| 21    | 35        | M   | 0.26         | 1.58         | ND           | PDHA1 | c.1157-58 ins 4 dup       | fs term      |
| 22    | 40        | M   | ND           | 0.41         | ND           | PDHA1 | c.629T>C                  | M210T        |
| 23    | 43        | M   | ND           | 0.23         | 0.06         | PDHA1 | c.1133G>A                 | R378H        |
| 24    | 45        | M   | ND           | 0.78         | ND           | PDHA1 | c.977-78 ins dup 963-77   |              |
| 25    | 52        | M   | ND           | 0.50         | ND           | PDHA1 | c.383G>A                  | G128D        |
| 26    | 53        | M   | ND           | 0.67         | 0.80         | PDHA1 | c.491A>G                  | N164S        |
| 27    | 55        | M   | 0.92         | 0.31         | ND           | PDHA1 | pathogenic*               |              |
| 28    | 57        | M   | ND           | 0.93         | ND           | PDHA1 | c.787C>G                  | R263G        |
| 29    | 59        | M   | ND           | 1.11         | ND           | PDHA1 | c.491A>G hz               | N164S        |
| 30    | 61        | M   | 0.30         | 1.21         | ND           | PDHA1 | c.677G>A                  | R266         |
| 31    | 62        | M   | ND           | 0.48         | ND           | PDHA1 | c.1147T>C                 | W383R        |
| 32    | 63        | M   | 0.00         | 2.15         | ND           | PDHA1 | c.1132C>T                 | R378C        |
| 33    | 66        | M   | 1.06         | 0.42         | ND           | PDHA1 |                           | F205L        |
| 34    | 67        | M   | 0.22         | 0.35         | ND           | PDHA1 |                           | A236T        |
| 35    | 76        | M   | 0.80         | ND           | ND           | PDHA1 | c.788G>A                  | R263Q        |
| 36    | 78        | M   | ND           | 1.16         | ND           | PDHA1 | pathogenic*               |              |
| 37    | 82        | M   | ND           | ND           | 0.89         | PDHA1 | c.1095_1118dup            | N366_L373dup |
|       |           |     | Range Cutoff | Range Cutoff | Range Cutoff |       |                           |              |
|       |           |     | <0.98        | <1.26        | <1.20        |       |                           |              |

**Supplementary Table 1 (continue)**

| Count | Patient # | Sex | PDC Lymph           | PDC Fb              | PDC Musc            | Gene         | Mutation                | Protein     |
|-------|-----------|-----|---------------------|---------------------|---------------------|--------------|-------------------------|-------------|
| 1     | 10        | F   | 1.89                | <b>0.68</b>         | ND                  | <i>PDHA1</i> | c.904C>T                | R302C       |
| 2     | 12        | F   | 2.24                | <b>0.29</b>         | ND                  | <i>PDHA1</i> | 1102 ins dup 1083-1102  |             |
| 3     | 14        | F   | 1.22                | ND                  | <b>0.46</b>         | <i>PDHA1</i> | 952-53 ins dup 949-52   | R302H       |
| 4     | 15        | F   | <b>0.63</b>         | <b>0.95</b>         | ND                  | <i>PDHA1</i> | 890-91insC              | fs297-303   |
| 5     | 16        | F   | 2.18                | <b>0.57</b>         | 1.27                | <i>PDHA1</i> | c.787C>T                | R263G       |
| 6     | 19        | F   | <b>0.70</b>         | <b>0.83</b>         | ND                  | <i>PDHA1</i> | c.422G>A                | R141Q       |
| 7     | 20        | F   | ND                  | <b>0.33</b>         | ND                  | <i>PDHA1</i> | 982-85 ins dup 982-85   |             |
| 8     | 21        | F   | ND                  | <b>0.24</b>         | <b>0.58</b>         | <i>PDHA1</i> | c.499G>A                | Y167M       |
| 9     | 29        | F   | ND                  | <b>0.97</b>         | ND                  | <i>PDHA1</i> | 1145-46 dup ins 1142-45 |             |
| 10    | 30        | F   | ND                  | <b>0.70</b>         | ND                  | <i>PDHA1</i> | c.940C>T                |             |
| 11    | 31        | F   | ND                  | 1.50                | <b>0.61</b>         | <i>PDHA1</i> | c.616G>A                | E205K       |
| 12    | 32        | F   | ND                  | <b>0.72</b>         | ND                  | <i>PDHA1</i> | c.862C>T                | R288C       |
| 13    | 33        | F   | ND                  | <b>0.39</b>         | ND                  | <i>PDHA1</i> | c.847G>A                | E283K       |
| 14    | 36        | F   | ND                  | <b>0.57</b>         | ND                  | <i>PDHA1</i> | 998_999ins13dup986_998  | fs(334_343) |
| 15    | 37        | F   | 1.58                | <b>1.05</b>         | <b>0.78</b>         | <i>PDHA1</i> | 934-940 del             | fs312-323   |
| 16    | 38        | F   | ND                  | <b>0.72</b>         | 2.28                | <i>PDHA1</i> | c.355C>T                | R119W       |
| 17    | 39        | F   | ND                  | <b>0.59</b>         | ND                  | <i>PDHA1</i> | c.904C>T                | R302C       |
| 18    | 41        | F   | <b>0.90</b>         | ND                  | <b>0.58</b>         | <i>PDHA1</i> | c.787C>G                | Y243C       |
| 19    | 42        | F   | ND                  | <b>0.92</b>         | <b>0.96</b>         | <i>PDHA1</i> | c.301T>C                | C101R       |
| 20    | 44        | F   | ND                  | <b>0.59</b>         | ND                  | <i>PDHA1</i> | c.269T>C                | R90S        |
| 21    | 46        | F   | ND                  | <b>1.06</b>         | ND                  | <i>PDHA1</i> | c.901C>T                |             |
| 22    | 47        | F   | ND                  | <b>0.37</b>         | ND                  | <i>PDHA1</i> | c.1132C>T               | R378C       |
| 23    | 48        | F   | 1.11                | <b>0.48</b>         | ND                  | <i>PDHA1</i> | c.728A>G                | Y243C       |
| 24    | 49        | F   | ND                  | <b>0.26</b>         | ND                  | <i>PDHA1</i> | c.904C>T                | R302C       |
| 25    | 50        | F   | ND                  | <b>0.59</b>         | ND                  | <i>PDHA1</i> | c.738C>T                |             |
| 26    | 51        | F   | ND                  | <b>0.64</b>         | ND                  | <i>PDHA1</i> | c.905G>A                | R302H       |
| 27    | <b>54</b> | F   | ND                  | <b>1.10</b>         | 2.38                | <i>PDHA1</i> | c.900-3_922dup          | Q307LfsX12  |
| 28    | <b>56</b> | F   | <b>0.00</b>         | <b>0.33</b>         | <b>0.15</b>         | <i>PDHA1</i> | 831+1G>A                |             |
| 29    | 58        | F   | 4.69                | <b>0.71</b>         | ND                  | <i>PDHA1</i> | 899+1G>C                |             |
| 30    | 60        | F   | 2.36                | <b>0.56</b>         | ND                  | <i>PDHA1</i> | c.871G>A                | G291R       |
| 31    | <b>69</b> | F   | ND                  | <b>0.62</b>         | 2.60                | <i>PDHA1</i> | c.1153_1155dupAAG       | K385dup     |
| 32    | <b>74</b> | F   | <b>0.58</b>         | ND                  | 2.02                | <i>PDHA1</i> | c.989C>G                | A330G       |
| 33    | <b>80</b> | F   | 2.07                | <b>0.37</b>         | ND                  | <i>PDHA1</i> | c.225G>T                |             |
|       |           |     | <b>Range Cutoff</b> | <b>Range Cutoff</b> | <b>Range Cutoff</b> |              |                         |             |
|       |           |     | <0.98               | <1.26               | <1.20               |              |                         |             |

**Supplementary Table 1.** Enzymatic and genetic characteristics of the *PDHA1*-Only group by gender. Values in red (bold) represent PDC activity (nmol/min/mg protein) below cutoff for specific cell/tissue (see Materials and Methods Section 2.2 for cutoff values). Yellow highlights indicate samples with more than one cell/tissue type assayed. Subjects in green are also within the Molecular-First Approach group (see Supplementary Table 2). Subjects referred to CIDEM for PDC testing with limited molecular information regarding their *PDHA1* variant and found to be functionally PDC deficient are noted as pathogenic. Abbreviations: ND, not done; Lymph, lymphocytes; Fb, fibroblasts; Musc, skeletal muscle; fs, frameshift; and term, termination. \*These subjects have been deceased for many years and attempts to obtain detailed *PDHA1* variant information for review and reporting were unsuccessful.
