# Supplementary material
Source: PubMed Central journal article supplement (PMC5722699)
Supplement: NIHMS906146-supplement-4.pdf [file NIHMS906146-supplement-4.pdf]

Supplementary Table 2

| Count | Patient # | Sex | PDC Lymph    | PDC Fb       | PDC Musc     | Gene         | Initial designation | Mutation                       |
|-------|-----------|-----|--------------|--------------|--------------|--------------|---------------------|--------------------------------|
| 1     | 18        | F   | 1.38         | ND           | ND           | <i>PDHA1</i> | VUS                 | unresolved                     |
| 2     | 54        | F   | ND           | 1.10         | 2.38         | <i>PDHA1</i> | VUS                 | c.900-3_922dup<br>Q307LfsX12   |
| 3     | 56        | F   | 0.00         | 0.33         | 0.15         | <i>PDHA1</i> | VUS                 | 831+1G>A                       |
| 4     | 64        | F   | ND           | ND           | 1.88         | <i>PDHA1</i> | VUS                 | unresolved                     |
| 5     | 68        | F   | 3.26         | ND           | ND           | <i>PDHA1</i> | pathogenic          | c.1142_1145dup<br>W383fs       |
| 6     | 69        | F   | ND           | 0.62         | 2.60         | <i>PDHA1</i> | VUS                 | K385dup                        |
| 7     | 70        | F   | 2.09         | 3.16         | ND           | <i>PDHA1</i> | VUS                 | unresolved                     |
| 8     | 73        | F   | 1.79         | ND           | ND           | <i>PDHA1</i> | VUS                 | unresolved                     |
| 9     | 74        | F   | 0.58         | ND           | 2.02         | <i>PDHA1</i> | VUS                 | A330G                          |
| 10    | 75        | F   | 1.63         | ND           | 1.48         | <i>PDHA1</i> | VUS                 | A175P                          |
| 11    | 80        | F   | 2.07         | 0.37         | ND           | <i>PDHA1</i> | VUS                 | c.225G>T                       |
| 12    | 81        | F   | 1.47         | ND           | ND           | <i>PDHA1</i> | VUS                 | unresolved                     |
| 13    | 55        | M   | 0.30         | 0.31         | ND           | <i>PDHA1</i> | VUS                 | pathogenic*                    |
| 14    | 57        | M   | ND           | 0.93         | ND           | <i>PDHA1</i> | VUS                 | c.787C>G R263G                 |
| 15    | 59        | M   | ND           | 1.11         | ND           | <i>PDHA1</i> | VUS                 | c.491A>G N164S                 |
| 16    | 61        | M   | 0.30         | 1.21         | ND           | <i>PDHA1</i> | VUS                 | c.677G>A R226                  |
| 17    | 62        | M   | ND           | 0.48         | ND           | <i>PDHA1</i> | VUS                 | c.1147T>C W383R                |
| 18    | 63        | M   | 0.00         | 2.15         | ND           | <i>PDHA1</i> | pathogenic          | c.1132C>T R378C                |
| 19    | 65        | M   | 1.70         | ND           | ND           | <i>PDHA1</i> | probably pathogenic | A349T                          |
| 20    | 66        | M   | 0.84         | 0.42         | ND           | <i>PDHA1</i> | VUS                 | F205L                          |
| 21    | 67        | M   | 0.22         | 0.35         | ND           | <i>PDHA1</i> | VUS                 | A236T                          |
| 22    | 71        | M   | 1.74         | ND           | ND           | <i>PDHA1</i> | VUS                 | unresolved                     |
| 23    | 72        | M   | 1.46         | ND           | ND           | <i>PDHA1</i> | VUS                 | unresolved                     |
| 24    | 76        | M   | 0.80         | ND           | ND           | <i>PDHA1</i> | VUS                 | R263Q                          |
| 25    | 77        | M   | ND           | 1.66         | ND           | <i>PDHA1</i> | VUS                 | unresolved                     |
| 26    | 78        | M   | ND           | 1.16         | ND           | <i>PDHA1</i> | VUS                 | pathogenic*                    |
| 27    | 79        | M   | 2.32         | ND           | ND           | <i>PDHA1</i> | VUS                 | A136T                          |
| 28    | 82        | M   | ND           | ND           | 0.89         | <i>PDHA1</i> | VUS                 | c.1095_1118dup<br>N366_L373dup |
| 29    | 83        | M   | 3.16         | ND           | ND           | <i>PDHA1</i> | VUS                 | unresolved                     |
|       |           |     | Range Cutoff | Range Cutoff | Range Cutoff |              |                     |                                |
|       |           |     | <0.98        | <1.26        | <1.20        |              |                     |                                |

**Supplementary Table 2.** Samples with an unclassified/known *PDHA1* variant referred to CIDEM for testing (representing Molecular-First Approach group). Values in red (bold) represent PDC activity (nmol/min/mg protein) below cutoff for specific cell/tissue (see Materials and Methods Section 2.2 for cutoff values). Yellow highlights indicate samples with more than one cell/tissue type assayed. Subjects in green are also within the *PDHA1*-Only group (see Supplementary Table 1). If subjects with an unclassified/known *PDHA1* variant referred to CIDEM for PDC testing, are found to be enzymatically deficient (or not deficient), the molecular variant is reclassified as pathogenic (or unresolved). Abbreviations: ND, not done; Lymph, lymphocytes; Fb, fibroblasts; fs, frameshift; and Musc, skeletal muscle. \*These subjects have been deceased for many years and attempts to obtain detailed *PDHA1* variant information for review and reporting were unsuccessful.
